# Supplementary material for: Safety of High-Dose Vitamin D Supplementation Among Children Aged 0 to 6 Years: A Systematic Review and Meta-analysis
Source: PubMed Central journal article supplement (PMC9011124; doi:10.1001/jamanetworkopen.2022.7410), 2022-04-14
Supplement: jamanetwopen-e227410-s001.pdf [file jamanetwopen-e227410-s001.pdf]

## Supplementary Online Content

Brustad N, Yousef S, Stokholm J, Bønnelykke K, Bisgaard H, Chawes BL. Safety of high-dose vitamin D supplementation among children aged 0 to 6 years: a systematic review and meta-analysis. *JAMA Netw Open*. 2022;5(4):e227410. doi:10.1001/jamanetworkopen.2022.7410

**eFigure 1.** Division of Search Terms

**eFigure 2.** Funnel Plot of Studies Included in the Meta-analysis of Serious Adverse Events by High-Dose Vitamin D Interventions

**eTable 1.** Search Protocol

**eTable 2.** Risk of Bias Score

**eReferences**

This supplementary material has been provided by the authors to give readers additional information about their work.

**eFigure 1. Division of Search Terms**

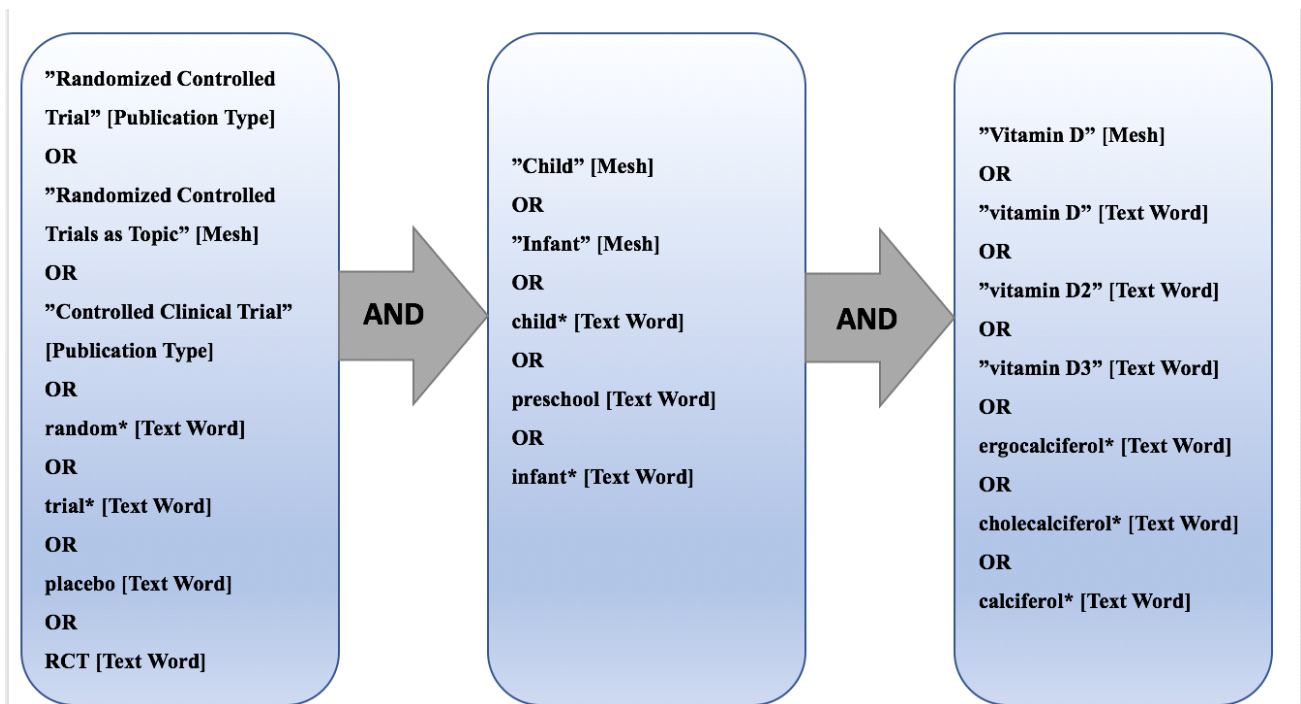

**eFigure 2.** Funnel Plot of Studies Included in the Meta-analysis of Serious Adverse Events by High-Dose Vitamin D Interventions

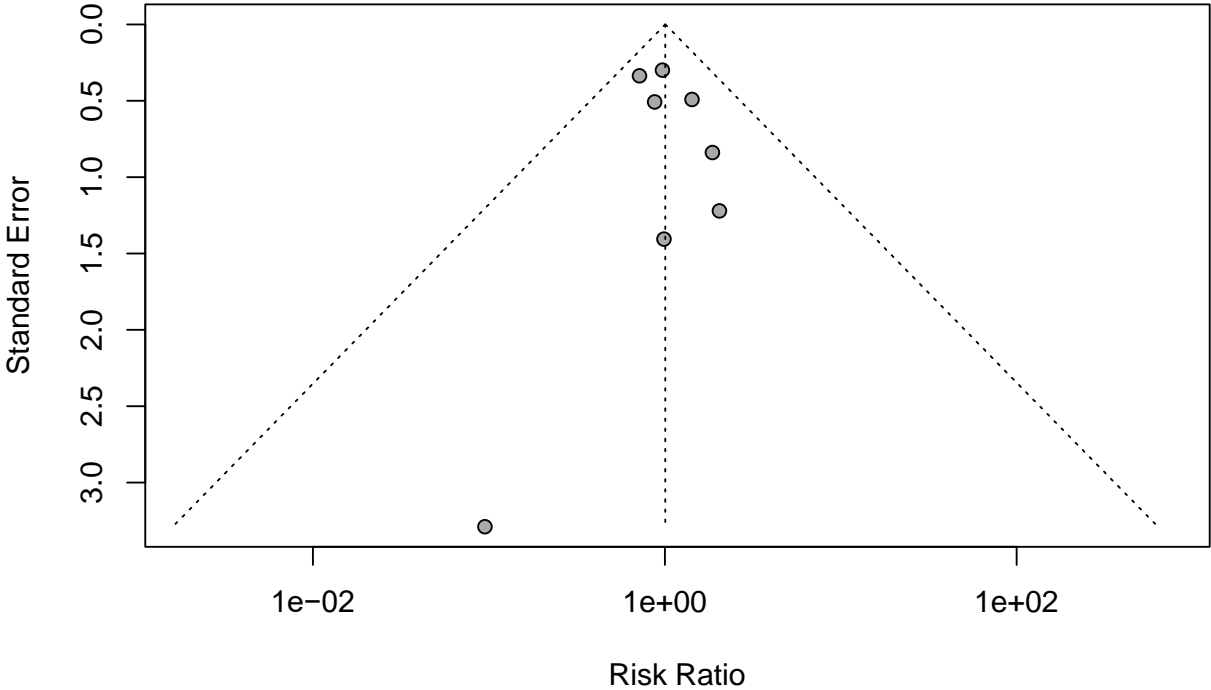



**eTable 2. Risk of Bias Score**

| <b>Study</b>                      | <b>The randomization process</b> | <b>Deviations from the intended interventions<br/>“effect of assignment to intervention”</b> | <b>Missing outcome data</b> | <b>Measurement of the outcome</b> | <b>The reported results</b> | <b>Overall risk</b> |
|-----------------------------------|----------------------------------|----------------------------------------------------------------------------------------------|-----------------------------|-----------------------------------|-----------------------------|---------------------|
| Singh et al, <sup>1</sup> 2019    | Some concerns                    | Some concerns                                                                                | Low                         | Some concerns                     | Some concerns               | High                |
| Saleem et al, <sup>2</sup> 2018   | Low                              | Low                                                                                          | Low                         | Low                               | Low                         | Low                 |
| Ducharme et al, <sup>3</sup> 2019 | Low                              | Low                                                                                          | Low                         | Low                               | Low                         | Low                 |
| Moslemi et al, <sup>4</sup> 2018  | Low                              | Low                                                                                          | Low                         | Low                               | Low                         | Low                 |
| Harnot et al, <sup>5</sup> 2016   | Low                              | Low                                                                                          | Low                         | Low                               | Low                         | Low                 |
| Mittal et al, <sup>6</sup> 2014   | Low                              | Low                                                                                          | Some concerns               | Some concerns                     | Some concerns               | High                |
| Mondal et al, <sup>7</sup> 2014   | Low                              | High                                                                                         | Some concerns               | High                              | Low                         | High                |
| Lubani et al, <sup>8</sup> 1989   | Some concerns                    | High                                                                                         | High                        | High                              | Some concerns               | High                |
| Zeghoud et al, <sup>9</sup> 1994  | Some concerns                    | High                                                                                         | Low                         | High                              | Some concerns               | High                |
| Mittal et al, <sup>10</sup> 2018  | Low                              | Some concerns                                                                                | Some concerns               | Low                               | Some concerns               | High                |
| Gupta et al, <sup>11</sup> 2016   | Low                              | Low                                                                                          | Low                         | Low                               | Low                         | Low                 |
| Somnath et al, <sup>12</sup> 2017 | Low                              | Some concerns                                                                                | Low                         | Low                               | Some concerns               | Some concerns       |
| Huynh et al, <sup>13</sup> 2016   | Low                              | Some concerns                                                                                | Low                         | Low                               | Low                         | Some concerns       |

|                                             |               |               |               |               |               |               |
|---------------------------------------------|---------------|---------------|---------------|---------------|---------------|---------------|
| Moodley et al, <sup>14</sup> 2015           | Low           | High          | High          | Low           | Some concerns | High          |
| Jensen et al, <sup>15</sup> 2016            | Low           | Some concerns | Low           | Low           | Low           | Some concerns |
| Manaseki-Holland et al, <sup>216</sup> 2012 | Low           | Low           | Low           | Low           | Low           | Low           |
| Manaseki-Holland et al, <sup>17</sup> 2010  | Low           | Low           | Low           | Low           | Low           | Low           |
| Shakiba et al, <sup>18</sup> 2010           | Low           | High          | High          | Low           | Some concerns | High          |
| Mawer et al, <sup>19</sup> 1986             | Some concerns | High          | High          | Low           | Some concerns | High          |
| Moya et al, <sup>20</sup> 1977              | High          | Some concerns | Low           | Low           | Some concerns | High          |
| Rosendahl et al, <sup>21</sup> 2018         | Low           | Low           | Low           | Low           | Low           | Low           |
| Choudhary et al, <sup>22</sup> 2011         | Low           | Low           | Low           | Low           | Some concerns | Some concerns |
| Gallo et al, <sup>23</sup> 2013             | Low           | Low           | Low           | Low           | Low           | Low           |
| Holmlund-Suila et al, <sup>24</sup> 2012    | Low           | Low           | Low           | Low           | Low           | Low           |
| Evans et al, <sup>25</sup> 1989             | Some concerns | High          | Low           | Low           | Some concerns | High          |
| Aglipay et al, <sup>26</sup> 2017           | Low           | Low           | Low           | Low           | Low           | Low           |
| Zhou et al, <sup>27</sup> 2018              | Some concerns | High          | Some concerns | Some concerns | Some concerns | High          |
| Tau et al, <sup>28</sup> 1986               | Some concerns | High          | High          | Some concerns | Some concerns | High          |

|                                          |               |      |     |     |               |      |
|------------------------------------------|---------------|------|-----|-----|---------------|------|
| Pacheco-Acosta et al, <sup>29</sup> 2020 | Some concerns | High | Low | Low | Some concerns | High |
| Aldaghi et al, <sup>30</sup> 2020        | Low           | Low  | Low | Low | Low           | Low  |
| Chowdhury et al, <sup>31</sup> 2021      | Low           | Low  | Low | Low | Low           | Low  |
| Saluja et al, <sup>32</sup> 2021         | Low           | Low  | Low | Low | Low           | Low  |

## References

1. Singh N, Kamble D, Mahantshetti NS. Effect of vitamin D supplementation in the prevention of recurrent pneumonia in under-five children. *Indian J Pediatr.* 2019;86(12):1105-1111. Medline:31346969 doi:10.1007/s12098-019-03025-z
2. Saleem J, Zakar R, Zakar MZ, et al. High-dose vitamin D3 in the treatment of severe acute malnutrition: a multicenter double-blind randomized controlled trial. *Am J Clin Nutr.* 2018;107(5):725-733. Medline:29722846 doi:10.1093/ajcn/nqy027
3. Ducharme FM, Jensen M, Mailhot G, et al. Impact of two oral doses of 100 000 IU of vitamin D3 in preschoolers with viral-induced asthma: a pilot randomised controlled trial. *Trials.* 2019;20(1):138. Medline:30777118 doi:10.1186/s13063-019-3184-z
4. Moslemi L, Esmaeili Dooki M, Moghadamnia AA, et al. Stoss therapy using fortified biscuit for vitamin D-deficient children: a novel treatment. *Pediatr Res.* 2018;84(5):662-667. Medline:30120406 doi:10.1038/s41390-018-0135-4
5. Harnot J, Verma S, Singhi S, Sankhyan N, Sachdeva N, Bharti B. Comparison of 300 000 and 600 000 IU oral vitamin-D bolus for vitamin-D deficiency in young children. *Indian J Pediatr.* 2017;84(2):111-116. Medline:27683282 doi:10.1007/s12098-016-2233-9
6. Mittal H, Rai S, Shah D, et al. 300 000 IU or 600 000 IU of oral vitamin D3 for treatment of nutritional rickets: a randomized controlled trial. *Indian Pediatr.* 2014;51(4):265-272. Medline:24825262 doi:10.1007/s13312-014-0399-76
7. Mondal K, Seth A, Marwaha RK, et al. A randomized controlled trial on safety and efficacy of single intramuscular versus staggered oral dose of 600 000 IU vitamin D in treatment of nutritional rickets. *J Trop Pediatr.* 2014;60(3):203-210. Medline:24401754 doi:10.1093/tropej/fmt1057
8. Lubani MM, al-Shab TS, al-Saleh QA, et al. Vitamin-D-deficiency rickets in Kuwait: the prevalence of a preventable disease. *Ann Trop Paediatr.* 1989;9(3):134-139. Medline:2475056 doi:10.1080/02724936.1989.11748616
9. Zeghoud F, Ben-Mekhbi H, Djeghri N, Garabédian M. Vitamin D prophylaxis during infancy: comparison of the long-term effects of three intermittent doses (15, 5, or 2.5 mg) on 25-hydroxyvitamin D concentrations. *Am J Clin Nutr.* 1994;60(3):393-396. Medline:8074071 doi:10.1093/ajcn/60.3.393
10. Mittal M, Yadav V, Khadgawat R, Kumar M, Sherwani P. Efficacy and safety of 90 000 IU versus 300 000 IU single dose oral vitamin D in nutritional rickets: a randomized controlled trial. *Indian J Endocrinol Metab.* 2018;22(6):760-765. Medline:30766814 doi:10.4103/ijem.IJEM\_84\_18
11. Gupta P, Dewan P, Shah D, et al. Vitamin D supplementation for treatment and prevention of pneumonia in under-five children: A Randomized Double-blind Placebo Controlled Trial. *Indian Pediatr.* 2016;53(11):967-976. Medline:27889723 doi:10.1007/s13312-016-0970-5
12. Somnath SH, Biswal N, Chandrasekaran V, Jagadisan B, Bobby Z. Therapeutic effect of vitamin D in acute lower respiratory infection: a randomized controlled trial. *Clin Nutr ESPEN.* 2017;20:24-28. Medline:29072165 doi:10.1016/j.clnesp.2017.02.003
13. Huynh J, Lu T, Liew D, et al. Vitamin D in newborns: a randomised controlled trial comparing daily and single oral bolus vitamin D in infants. *J Paediatr Child Health.* 2017;53(2):163-169. Medline:27670154 doi:10.1111/jpc.13338
14. Moodley A, Spector SA. Single high-dose vitamin D at birth corrects vitamin D deficiency in infants in Mexico. *Int J Food Sci Nutr.* 2015;66(3):336-341. Medline:25582182 doi:10.3109/09637486.2014.992006
15. Jensen ME, Mailhot G, Alos N, et al. Vitamin D intervention in preschoolers with viral-induced asthma (DIVA): a pilot randomised controlled trial. *Trials.* 2016;17(1):353. Medline:27456232 doi:10.1186/s13063-016-1483-1
16. Manaseki-Holland S, Maroof Z, Bruce J, et al. Effect on the incidence of pneumonia of vitamin D supplementation by quarterly bolus dose to infants in Kabul: a randomised controlled superiority trial. *Lancet.* 2012;379(9824):1419-1427. Medline:22494826 doi:10.1016/S0140-6736(11)61650-4
17. Manaseki-Holland S, Qader G, Isaq Masher M, et al. Effects of vitamin D supplementation to children diagnosed with pneumonia in Kabul: a randomised controlled trial. *Trop Med Int Health.* 2010;15(10):1148-1155. Medline:20723187 doi:10.1111/j.1365-3156.2010.02578.x
18. Shakiba M, Sadr S, Nefei Z, Mozaffari-Khosravi H, Lotfi MH, Bemanian MH. Combination of bolus dose vitamin D with routine vaccination in infants: a randomised trial. *Singapore Med J.* 2010;51(5):440-445. Medline:20593151
19. Mawer EB, Stanbury W, Robinson MJ, James J, Close C. Vitamin D nutrition and vitamin D metabolism in the premature human neonate. *Clin Endocrinol (Oxf).* 1986;25(6):641-649. Medline:3652468 doi:10.1111/j.1365-2265.1986.tb03619.x
20. Moya M, Beltran J, Colomer J. Therapeutic and collateral effects of 25-hydroxycholecalciferol in vitamin D deficiency. *Eur J Pediatr.* 1977;127(1):49-55. Medline:23950 doi:10.1007/BF00465565
21. Rosendahl J, Valkama S, Holmlund-Suila E, et al. Effect of higher vs standard dosage of vitamin D3 supplementation on bone strength and infection in healthy infants: a randomized clinical trial. *JAMA Pediatr.* 2018;172(7):646-654. Medline:29813149 doi:10.1001/jamapediatrics.2018.0602
22. Choudhary N, Gupta P. Vitamin D supplementation for severe pneumonia—a randomized controlled trial. *Indian Pediatr.* 2012;49(6):449-454. Medline:21992858 doi:10.1007/s13312-012-0073-x



23. Gallo S, Comeau K, Vanstone C, et al. Effect of different dosages of oral vitamin D supplementation on vitamin D status in healthy, breastfed infants: a randomized trial. *JAMA*. 2013;309(17):1785-1792. Medline:23632722 doi:10.1001/jama.2013.3404
24. Holmlund-Suila E, Viljakainen H, Hytinantti T, Lamberg-Allardt C, Andersson S, Mäkitie O. High-dose vitamin d intervention in infants—effects on vitamin D status, calcium homeostasis, and bone strength. *J Clin Endocrinol Metab*. 2012;97(11):4139-4147. Medline:22933541 doi:10.1210/jc.2012-1575
25. Evans JR, Allen AC, Stinson DA, et al. Effect of high-dose vitamin D supplementation on radiographically detectable bone disease of very low birth weight infants. *J Pediatr*. 1989;115(5, pt 1):779-786. Medline:2809913 doi:10.1016/S0022-3476(89)80662-6
26. Aglipay M, Birken CS, Parkin PC, et al; TARGet Kids! Collaboration. Effect of high-dose vs standard-dose wintertime vitamin D supplementation on viral upper respiratory tract infections in young healthy children. *JAMA*. 2017;318(3):245-254. Medline:28719693 doi:10.1001/jama.2017.8708
27. Zhou J, Du J, Huang L, Wang Y, Shi Y, Lin H. Preventive effects of vitamin D on seasonal influenza A in infants: a multicenter, randomized, open, controlled clinical trial. *Pediatr Infect Dis J*. 2018;37(8):749-754. Medline:29315160 doi:10.1097/INF.0000000000001890
28. Tau C, Garabedian M, Farriaux JP, Czernichow P, Pomarede R, Balsan S. Hypercalcemia in infants with congenital hypothyroidism and its relation to vitamin D and thyroid hormones. *J Pediatr*. 1986;109(5):808-814. Medline:3490559 doi:10.1016/S0022-3476(86)80698-9
29. Pacheco-Acosta J, Pizarro F. Effect of vitamin D supplementation as a single dose on the nutritional status of vitamin D [in Spanish and English]. *Rev Chil Pediatr*. 2020;91(5):684-690. Medline:33399632 doi:10.32641/rchped.v91i5.1402
30. Aldaghi M, Tehrani H, Karrabi M, Abadi FS, Sahebkar M. The effect of multistrain synbiotic and vitamin D3 supplements on the severity of atopic dermatitis among infants under 1 year of age: a double-blind, randomized clinical trial study. *J Dermatolog Treat*. Published online June 26, 2020. Medline:32530339 doi:10.1080/09546634.2020.1782319
31. Chowdhury F, Shahid ASMSB, Tabassum M, et al. Vitamin D supplementation among Bangladeshi children under-five years of age hospitalised for severe pneumonia: a randomised placebo controlled trial. *PLoS One*. 2021;16(2):e0246460. Medline:33606713 doi:10.1371/journal.pone.0246460
32. Saluja RK, Dewan P, Gomber S, Madhu SV, Bhat S, Gupta P. Low dose depot oral vitamin D3 v daily oral vitamin D3 for treating nutritional rickets: a randomised clinical trial. *Br J Nutr*. Published online July 19, 2021. doi:10.1017/S0007114521002713
